# Supplementary material for: Fabrication of a Plasmonic Heterojunction for Degradation of Oxytetracycline Hydrochloride and Removal of Cr(VI) from Water
Source: MDPI journal article supplement (doi:10.3390/catal12121498), 2022-11-23
Supplement: s1 [file s1]

## **Supplementary materials**

### **1 Characterization**

The crystal phase of samples were determined by powder X-ray diffraction (XRD) using a XRD-6000 X-ray diffractometer (SHIMADZU, Kyoto, Tapan). X-ray photoelectron spectroscopy (XPS) was performed to identify the chemical compositions and the chemical states of the catalysts on a PHI5000 Versa Probe spectrometer (ULVAC-PHI, Kanagawa, Japan). Field emission scanning electron microscope (FESEM) and corresponding energy-dispersive X-ray spectroscopy (EDS) were conducted on a QUANTA FEG 250 scanning electron microscope (FEI Company, Hillsboro, OR, USA). The transmission electron microscopy (TEM) and high-resolution transmission electron microscopy (HRTEM) images were obtained on a JEM-200CX instrument (JEOL, Tokyo, Japan). Both UV-Vis diffuse reflectance spectra (UV-Vis/DRS) and photoluminescence spectra (PL) were recorded to measure the optical properties of the samples by UV-Vis spectrometry (UV-3600, Shimadzu, Kyoto, Tapan) and Fluorescence Spectrometry (Horiba HJY FM-4P-TCSPC, Montpellier, France). The Brunauer-Emmett-Teller (BET) surface area of the samples was determined by nitrogen adsorption on a BET ASAP 2020 Micromeritics instrument (Norcross, GA, USA). The photoelectrochemical characterization was carried out on a CHI760E electrochemical workstation with a standard three-electrode system (Shanghai, China), the samples were loaded onto ITO electrode (1 cm × 2 cm squares) and acted as the working electrode. The counter and reference electrodes were Pt plate and Ag/AgCl electrode. The electrolyte was 0.2 M Na<sub>2</sub>SO<sub>4</sub> aqueous solution and a 500 W xenon lamp was used to provide light source.

### **2 Analytical methods**

The concentration of OTH in solution was determined by UV–vis spectroscopy. The concentration of  $\text{Cr}^{6+}$  in solution was also determined by UV–vis spectroscopy using diphenylcarbazide reagent as a developer. The photocatalytic oxidation efficiency of OTH and the reduction efficiency of  $\text{Cr}^{6+}$  were calculated from the following expression:

$$\eta = (C_t - C_0) / C_0 \times 100\%$$

where  $\eta$  is the photocatalytic degradation efficiency;  $C_t$  and  $C_0$  are the concentration of OTH (or  $\text{Cr}^{6+}$ ) before and after photocatalytic reaction.

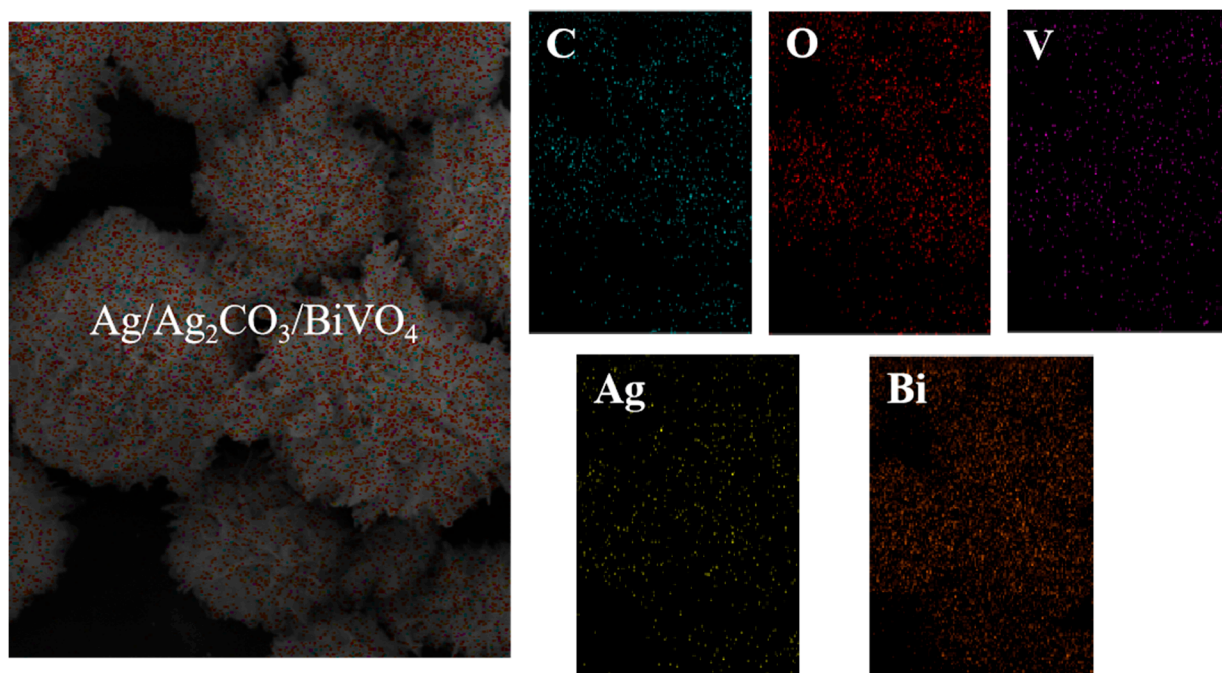

**Figure S1.** SEM-EDS elemental mapping of  $\text{Ag/Ag}_2\text{CO}_3/\text{BiVO}_4$ .

The SEM-EDS element mapping of  $\text{Ag/Ag}_2\text{CO}_3/\text{BiVO}_4$  in Figure S1 shows that it is composed of Bi, O, C, Ag and V elements.

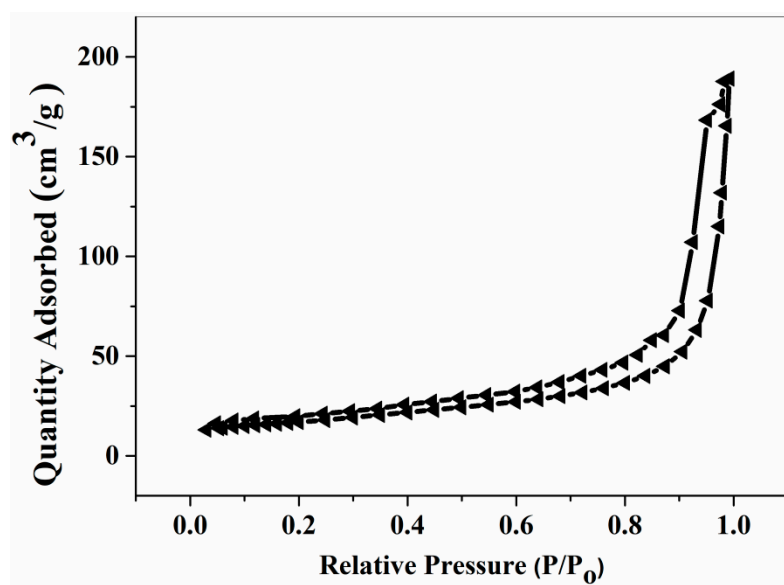

**Figure S2.** N<sub>2</sub>-adsorption isotherms of Ag/Ag<sub>2</sub>CO<sub>3</sub>/BiVO<sub>4</sub>

According to the measurement results, the specific surface area of Ag/Ag<sub>2</sub>CO<sub>3</sub>/BiVO<sub>4</sub> is large, and its value is 55.6 m<sup>2</sup>/g.
